# Supplementary material
Source: bioRxiv or medRxiv preprint supplement (https://www.biorxiv.org/highwire/filestream/77738/field_highwire_adjunct_files/0/252999-1.pdf)
Supplement: Supplementary file [file 252999-1.pdf]

## Supporting Information

### TABLES

**Table S1.** Spearman rank correlations between plant species richness (plant\_rich) and plant-derived environmental bioindication (Ellenberg Indicator Values; E\_light, E\_moisture, E\_pH, and E\_nutrients) and measured abiotic factors. The abiotic factors include soil pH, soil C, N and P concentrations (soil\_pH, soil\_c, soil\_n, soil\_p), leaf N and P concentrations (leaf\_n and leaf\_p), soil moisture (soil\_moisture), soil surface temperature (soil\_surface\_temp), air temperature (air\_temp), light intensity (light\_intensity), vapor pressure deficit (vpd), number of trees >40dbh (trees\_40dbh), dead wood volume (deadwood\_vol) and lidar derived mean canopy height (canopy\_height). Significance level indicated by: \*  $\leq 0.05$ , \*\*  $\leq 0.01$ , \*\*\*  $\leq 0.001$ .

|                   | plant_rich | E_light   | E_moisture | E_pH     | E_nutrients |
|-------------------|------------|-----------|------------|----------|-------------|
| E_light           | 0.152      |           |            |          |             |
| E_moisture        | 0.011      | 0.027     |            |          |             |
| E_pH              | 0.468***   | -0.13     | -0.262**   |          |             |
| E_nutrients       | 0.18*      | -0.458*** | -0.149     | 0.821*** |             |
| soil_ph           | 0.55***    | 0.2*      | -0.258**   | 0.702*** | 0.397***    |
| soil_c            | 0.292***   | 0.136     | -0.087     | 0.004    | -0.111      |
| soil_n            | 0.384***   | 0.113     | -0.495***  | 0.504*** | 0.338***    |
| soil_p            | 0.401***   | 0.018     | -0.486***  | 0.685*** | 0.535***    |
| leaf_n            | -0.025     | -0.374*** | 0.051      | 0.46***  | 0.681***    |
| leaf_p            | -0.006     | -0.246**  | -0.201*    | 0.442*** | 0.65***     |
| soil_moisture     | 0.14       | 0.087     | 0.854***   | -0.04    | -0.002      |
| soil_surface_temp | 0.122      | 0.609***  | -0.126     | -0.159   | -0.415***   |
| air_temp          | 0.134      | 0.433***  | -0.152     | 0.121    | -0.085      |
| light_intensity   | 0.125      | 0.737***  | 0.024      | -0.2*    | -0.497***   |
| vpd               | 0.078      | 0.561***  | -0.25**    | -0.129   | -0.405***   |
| trees_40dbh       | -0.213*    | -0.72***  | -0.132     | 0.064    | 0.356***    |
| deadwood_vol      | -0.195*    | -0.638*** | -0.012     | 0.031    | 0.331***    |
| canopy_height     | -0.198*    | -0.802*** | 0.043      | 0.019    | 0.328***    |

**Table S2.** Spearman rank correlation between plant species richness (plant\_rich) and species richness of other taxonomic groups and OTU richness. Significance level indicated by: \*  $\leq 0.05$ , \*\*  $\leq 0.01$ , \*\*\*  $\leq 0.001$ .

|                | plant_rich |
|----------------|------------|
| Bryophytes     | 0.016      |
| Carabids       | 0.028      |
| Gallers        | 0.381***   |
| Gastropods     | 0.221*     |
| Hoverflies     | 0.265**    |
| Lichens        | -0.006     |
| Macrofungi     | 0.059      |
| Spiders        | 0.247**    |
| Total richness | 0.165      |

FIGURES

Figure S1

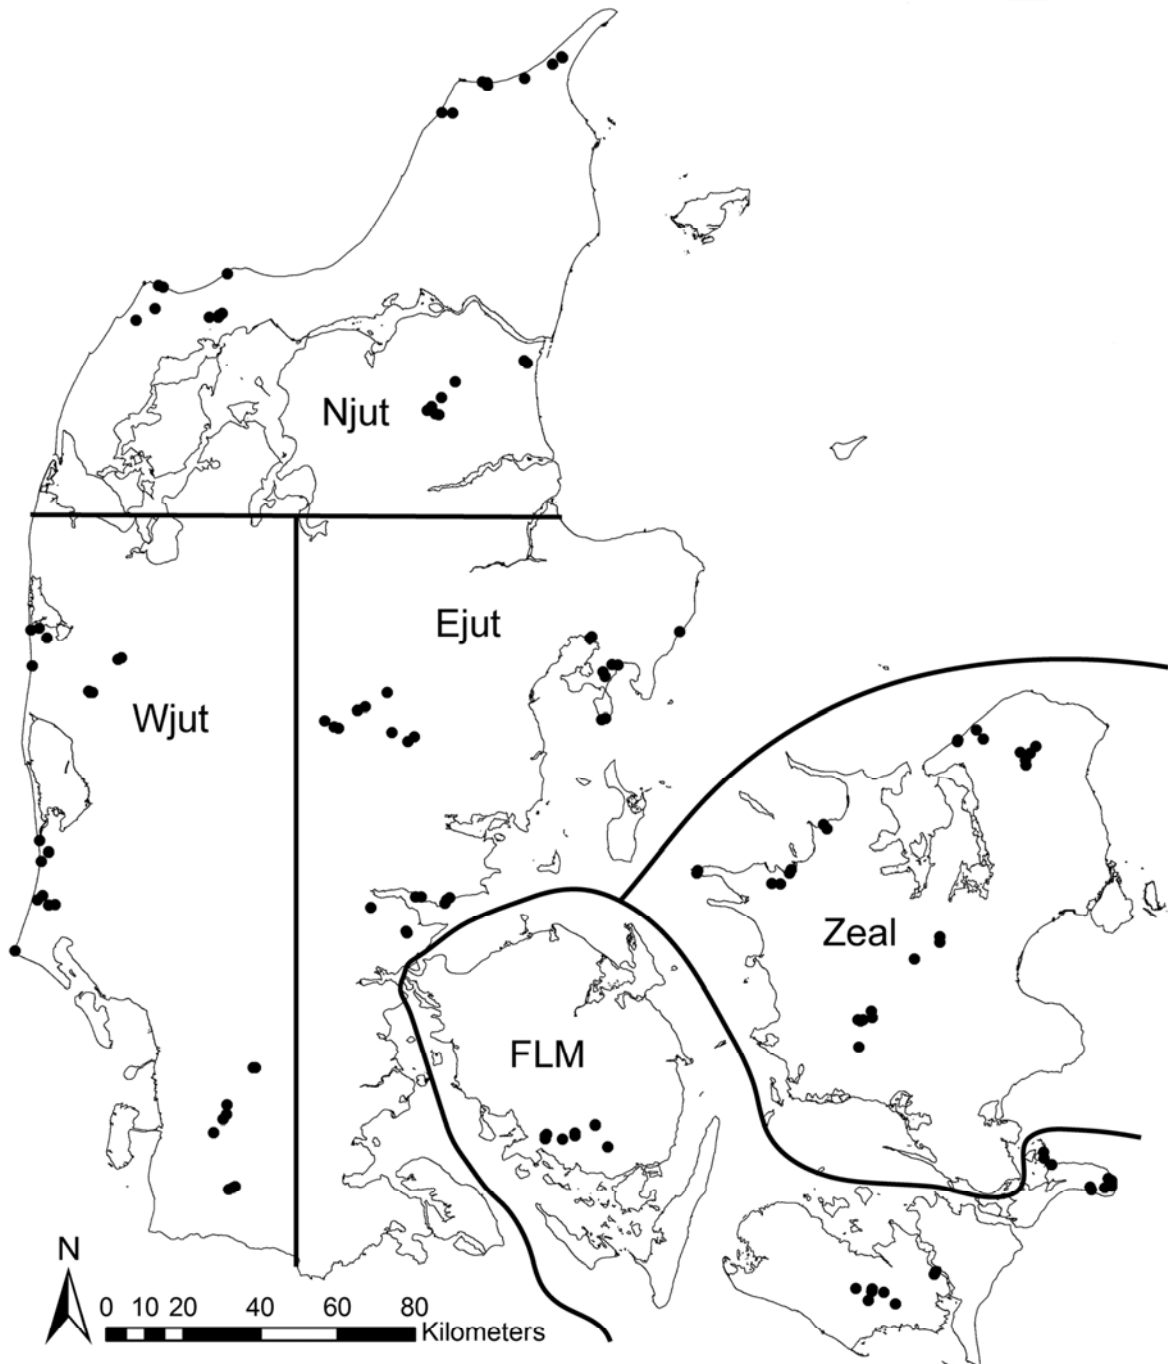

**Figure S1.** Map of Denmark showing the location of the 130 sites grouped into 15 clusters within five regions (Njut: Northern Jutland, Wjut: Western Jutland, Ejut: Eastern Jutland, FLM: Funen, Lolland, Møn, Zeal: Zealand).

**Figure S2**

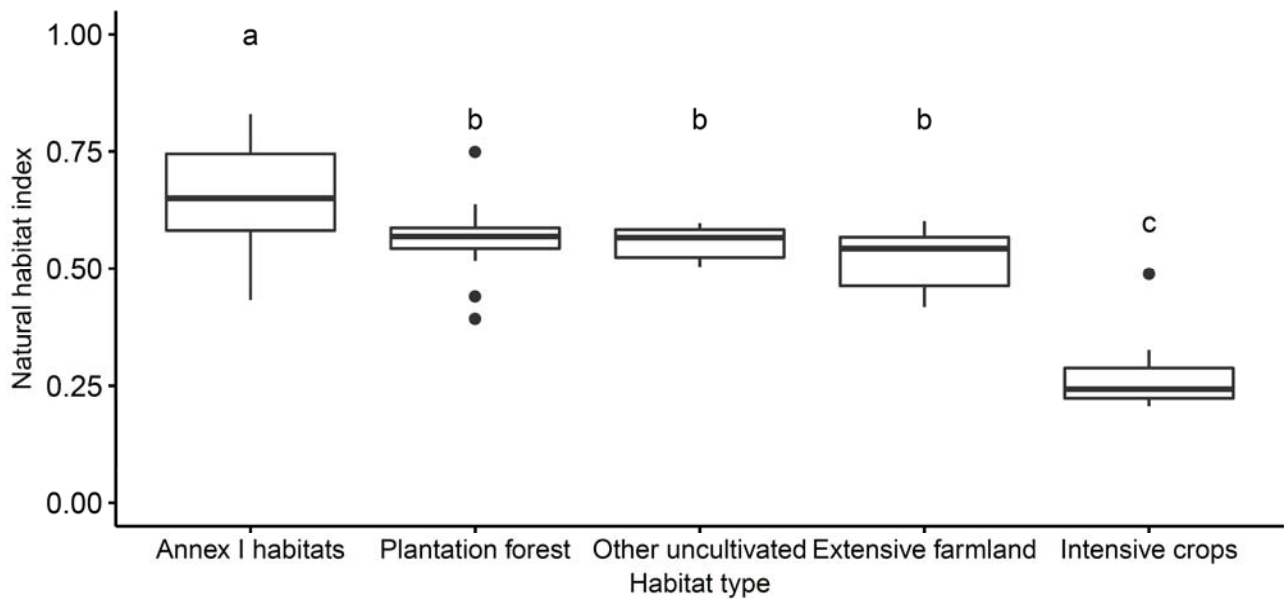

**Figure S2.** Boxplot of natural habitat index for sites of five different habitat types varying in naturalness from very natural (Annex 1 habitat) to medium natural (other uncultivated habitats, logged woodlands and extensive farming) to unnatural habitats (intensive crops). Letters indicate significant difference in means using Tukey tests.

Figure S3

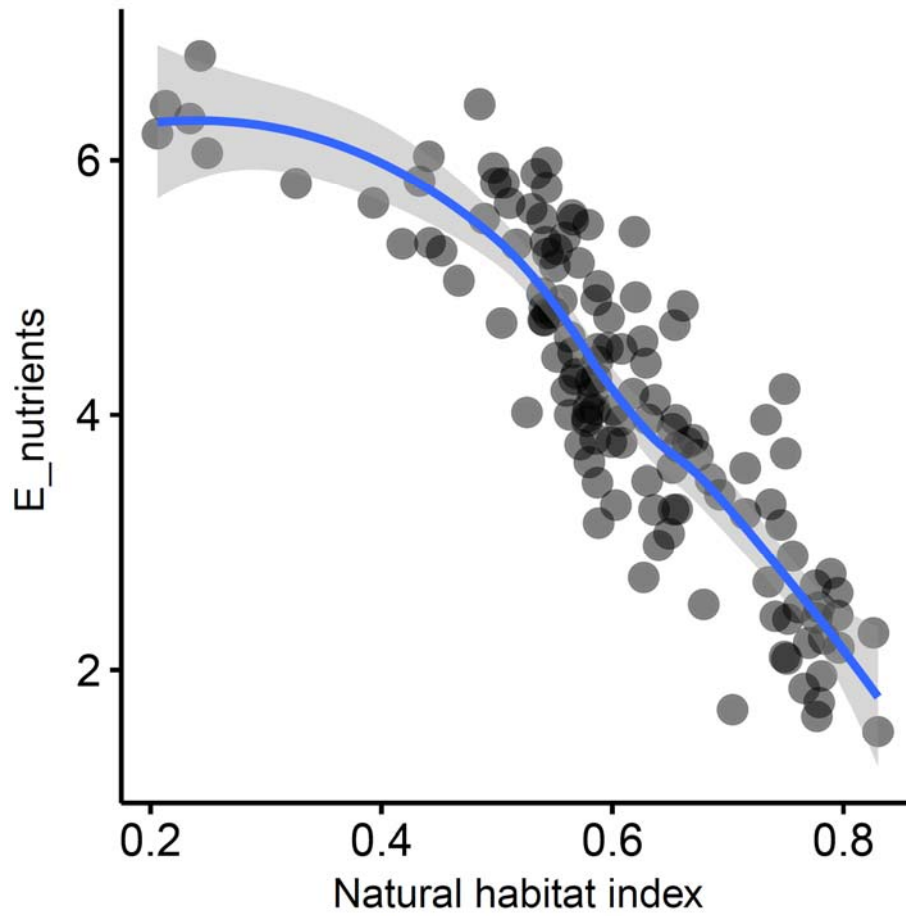

**Figure S3.** Correlation between natural habitat index and Ellenberg nutrient status (E\_nutrients) ( $R^2=0.73\%$  for a linear model). Loess smoother shown in blue.

Figure S4

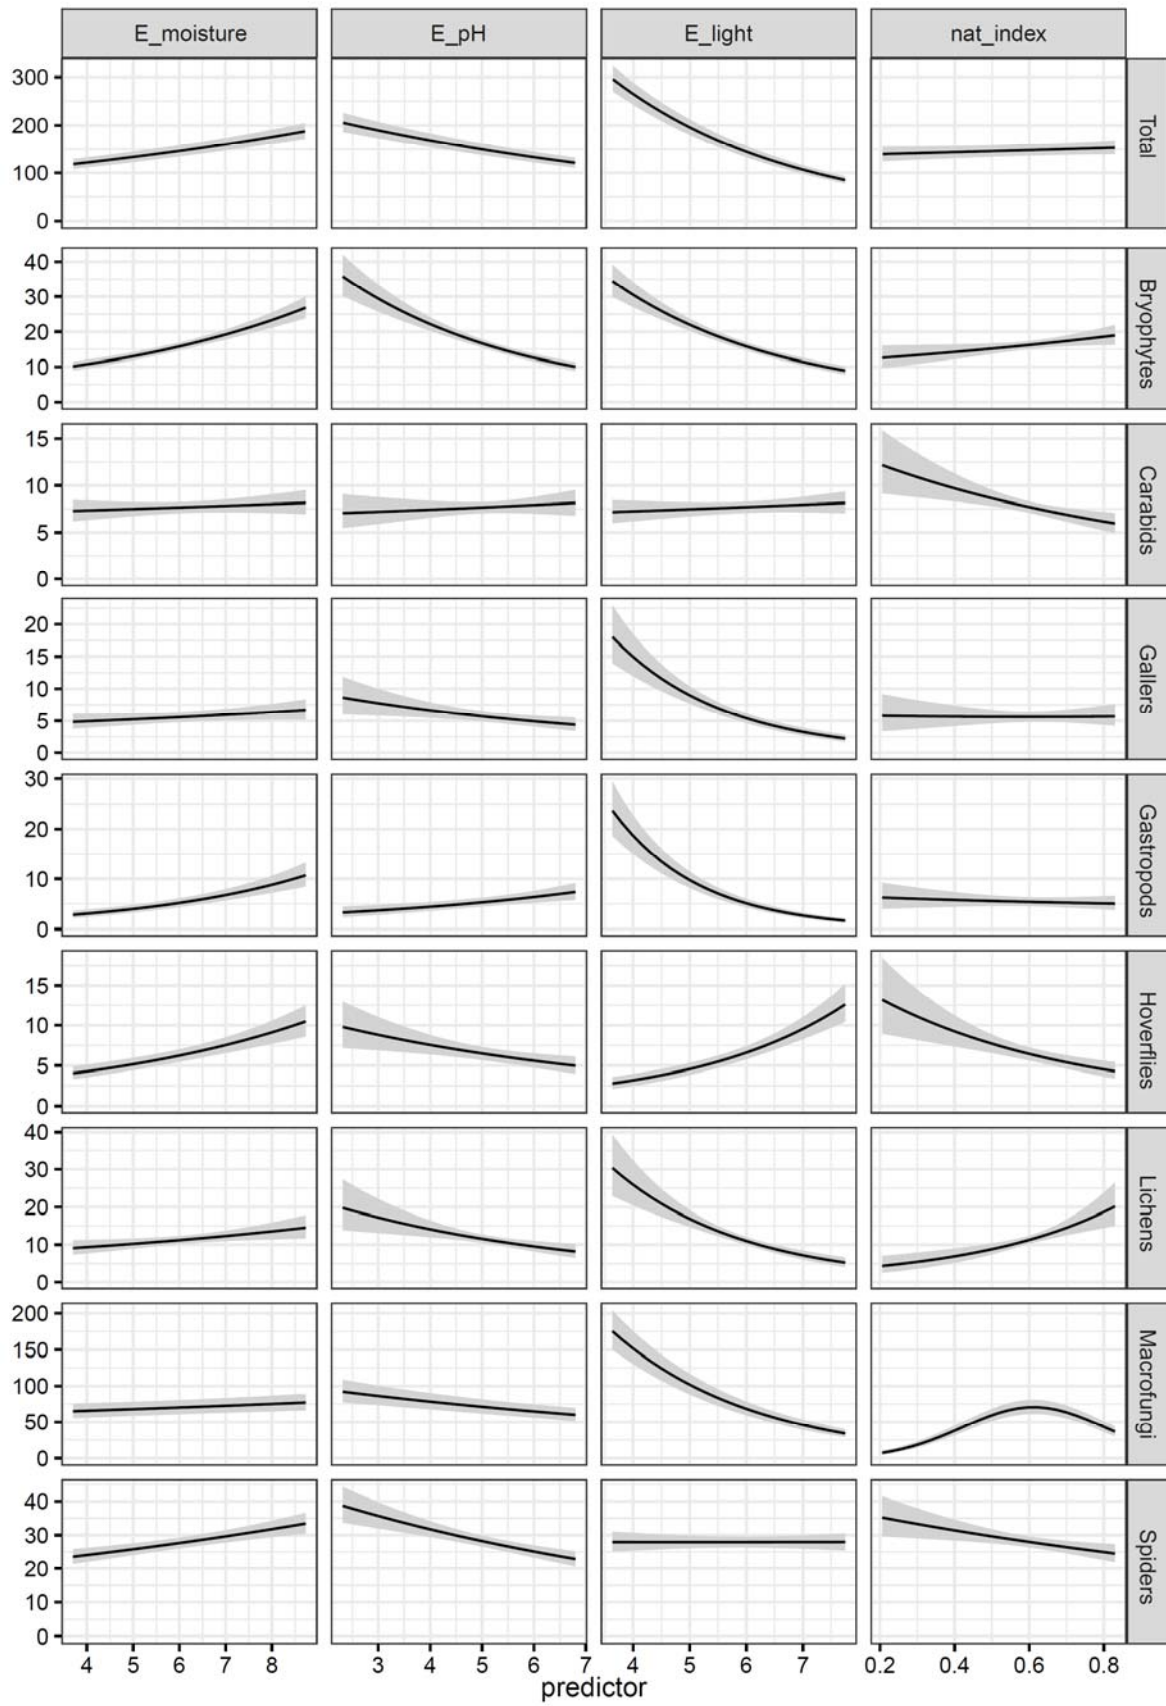

**Figure S4 continued**

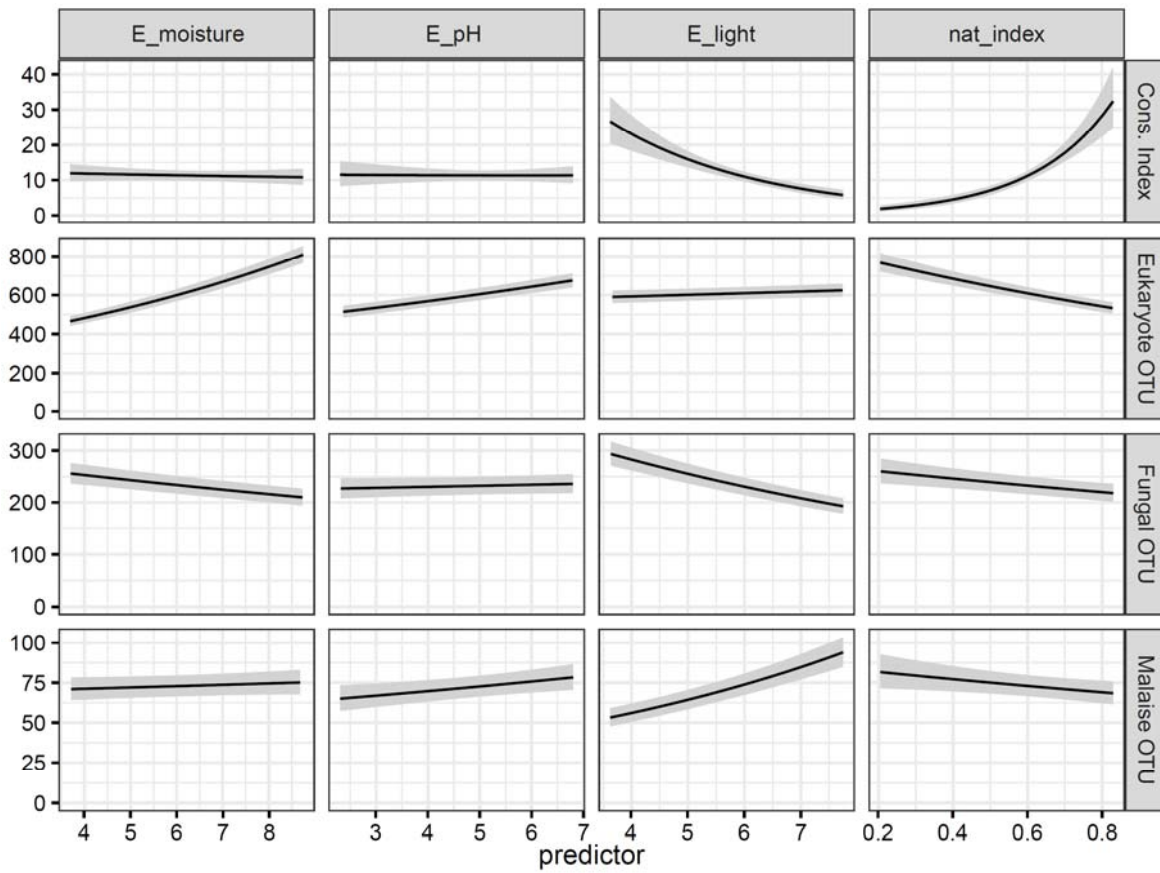

**Figure S4:** Multiple regression responses and 95% BCI of explanatory variables to species richness of various taxonomic groups, Conservation Index and OTU richness. For model details see table 1.
